# Supplementary material for: The effects of resveratrol on metabolic status in patients with type 2 diabetes mellitus and coronary heart disease
Source: Royal Society of Chemistry journal article supplement (doi:10.1039/c9fo01075k), 2019-01-01
Supplement: c9fo01075k1.pdf [file c9fo01075k1.pdf]

**Supplemental file 1.** Dietary intakes of study participants throughout the study

|                     | Placebo group<br>(n=28) | Resveratrol group<br>(n=28) | P <sup>1</sup> |
|---------------------|-------------------------|-----------------------------|----------------|
| Energy (kcal/d)     | 2159±253                | 2220±251                    | 0.37           |
| Carbohydrates (g/d) | 290.1±46.9              | 296.8±42.8                  | 0.58           |
| Protein (g/d)       | 81.3±20.5               | 85.2±17.7                   | 0.45           |
| Fat (g/d)           | 78.4±13.8               | 80.6±12.6                   | 0.53           |
| SFAs (g/d)          | 23.6±4.6                | 25.3±3.7                    | 0.14           |
| PUFAs (g/d)         | 24.2±4.2                | 25.1±7.5                    | 0.58           |
| MUFAs (g/d)         | 21.3±5.9                | 22.3±5.1                    | 0.51           |
| Cholesterol (mg/d)  | 214.8±140.8             | 195.6±81.2                  | 0.53           |
| TDF (g/d)           | 17.3±4.0                | 17.9±3.8                    | 0.55           |

Data are means± SDs.

<sup>1</sup> Obtained from independent t test.

MUFAs, monounsaturated fatty acids; PUFAs, polyunsaturated fatty acids; SFAs, saturated fatty acids; TDF, total dietary fiber.
